# Supplementary material for: Enhanced electrical properties of lead-free sodium potassium niobate piezoelectric ceramics prepared via cold sintering assisted sintering
Source: Royal Society of Chemistry journal article supplement (doi:10.1039/d4tc04031g), 2024-11-07
Supplement: d4tc04031g1.pdf [file d4tc04031g1.pdf]

## Supplementary materials

### Enhanced electrical properties of lead-free sodium potassium niobate piezoelectric ceramics prepared via cold sintering assisted sintering

Yao Huang<sup>1</sup>, Xinyue Song<sup>1</sup>, Renbing Sun<sup>2</sup>, Hai Jiang<sup>1</sup>, Peng Du<sup>1</sup>, Laihui Luo<sup>1,\*</sup>

<sup>1</sup>Department of Microelectronics Science and Engineering, School of Physical Science and Technology, Ningbo University, Ningbo, 315211, China

<sup>2</sup>College of Materials Science and Engineering, Ningbo University of Technology, Ningbo 315016, China

Corresponding authors: [luolaihui@nbu.edu.cn](mailto:luolaihui@nbu.edu.cn)

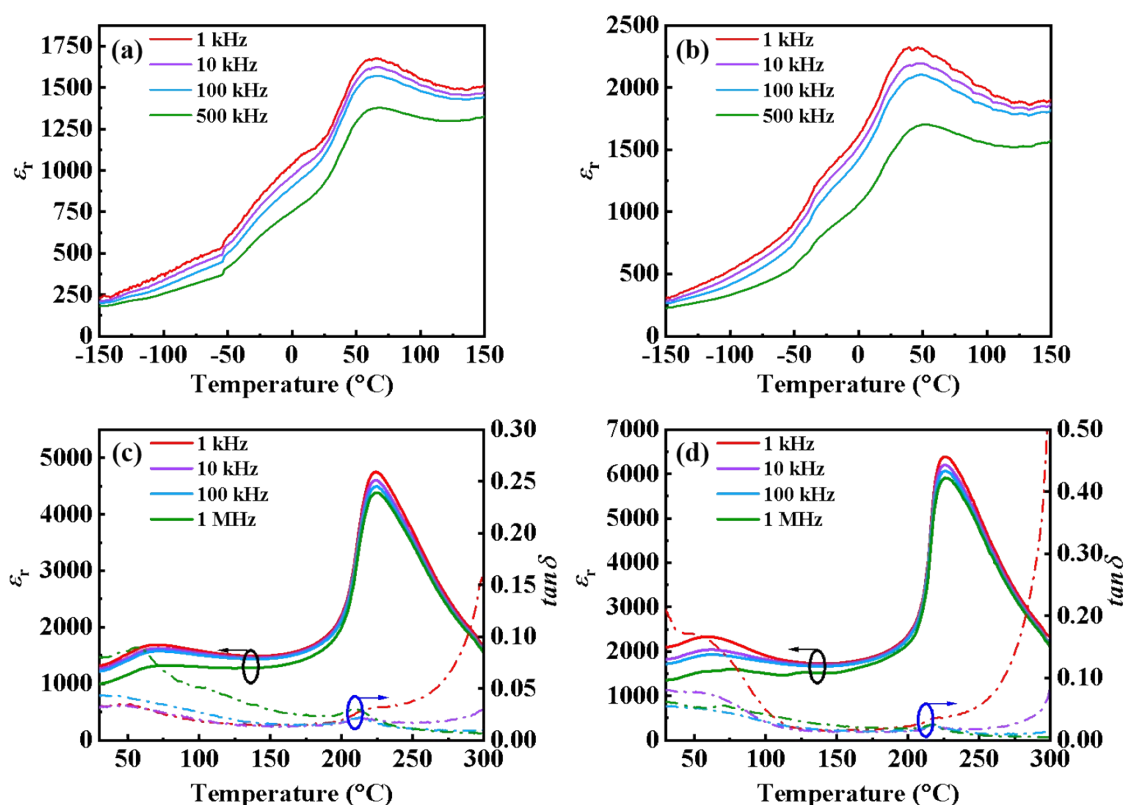

**Figure S1.** Temperature dependences of permittivity of (a) CS-1120 and (b) CSAS-1120 ceramics from -150 to 150 °C; temperature dependences of dielectric loss and permittivity of (c) CS-1120 and (d) CSAS-1120 ceramics from 30 to 300 °C.

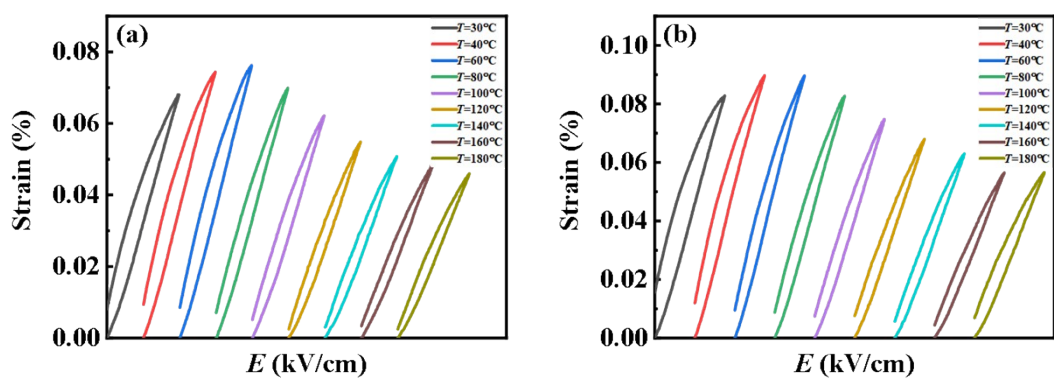

**Figure S2.** Temperature dependent unipolar  $S$ - $E$  curves of the ceramics with  
(a) CS-1120 (b) CSAS-1120.

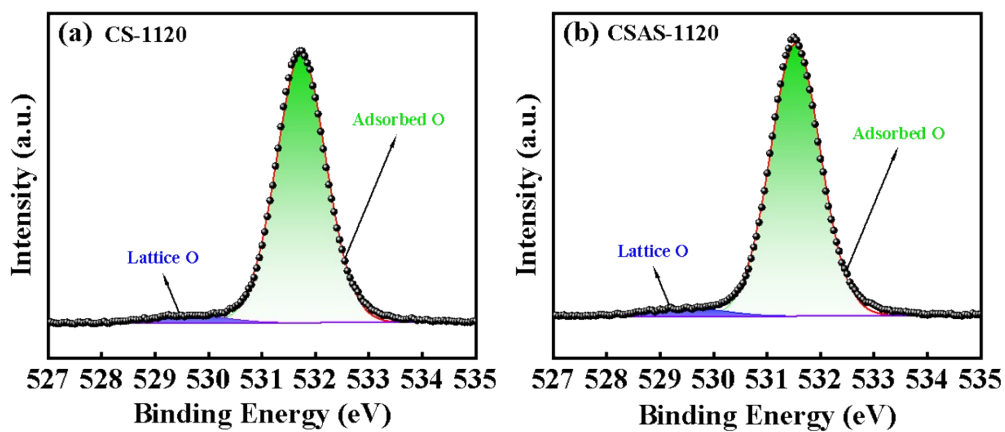

**Figure S3.** XPS spectra of O1s of (a) CS-1120, (b) CSAS-1120.
